# Supplementary material
Source: publisher figshare collection journal article supplement (https://karger.figshare.com/ndownloader/files/28188792)

**Supplemental Table**

SCN1B Variants with unknown clinical assertion.

| Variant Region ID | Location |
| --- | --- |
| nsv4682958 | chr19: 35521757-35521806, chr19: 35030853-35030902 |
| esv3221945 | chr19: 35521131-35521135, chr19: 35030227-35030231 |
| nsv934932 | chr19: 35521886-35523421, chr19: 35030982-35032517 |
| esv3423515 | chr19: 40212377-40214925, chr19: 35520537-35523085, chr19: 35029633-35032181 |
| esv1211989 | chr19: 40211488-40211489, chr19: 35519648-35519649, chr19: 35028744-35028745 |
| nsv3166811 | chr19: 35523429-35525005, chr19: 35032525-35034101 |
| nsv4501885 | chr19: 35522406-35522407, chr19: 35031502-35031503 |
| esv1327146 | chr19: 40211518-40211518, chr19: 35519678-35519678, chr19: 35028774-35028774 |
| nsv1955032 | chr19: 35527637-35527670, chr19: 35036733-35036766 |
| nsv1953726 | chr19: 35521342-35521370, chr19: 35030438-35030466 |
| nsv1953725 | chr19: 35521312-35521339, chr19: 35030408-35030435 |
| nsv1953828 | chr19: 35522266-35522288, chr19: 35031362-35031384 |
| nsv1955033 | chr19: 35528896-35528910, chr19: 35037992-35038006 |
| nsv1953727 | chr19: 35526175-35526189, chr19: 35035271-35035285 |
| nsv1955031 | chr19: 35526939-35526952, chr19: 35036035-35036048 |
| nsv1953827 | chr19: 35521132-35521144, chr19: 35030228-35030240 |
| nsv3881562 | chr19: 35521705-35530625, chr19: 35030801-35039721 |
| nsv4258013 | chr19: 35531061-35531134, chr19: 35040157-35040230 |
| nsv911610 | chr19: 40175519-40226776, chr19: 35483679-35534936, chr19: 34992775-35044032 |
| nsv3166819 | chr19: 35514137-35530610, chr19: 35023233-35039706 |
| nsv429510 | chr19: 34412588-35658548, chr19: 34903493-36149450, chr19: 39595333-40841290 |
| nsv984831 | chr19: 90910-58586487, chr19: 90910-59097854, chr19: 41910-63789666 |
| nsv911611 | chr19: 40175519-40281760, chr19: 35483679-35589920, chr19: 34992775-35099016 |
| nsv911612 | chr19: 40192891-40294338, chr19: 35501051-35602498, chr19: 35010147-35111594 |
| nsv3168446 | chr19: 35445908-45506757, chr19: 34955004-45003499 |
| nsv2782442 | chr19: 40171954-40352290, chr19: 35480114-35660450, chr19: 34989210-35169547 |
| nsv2752158 | chr19: 289244-58996454, chr19: 289244-58485087 |
| nsv1188496 | chr19: 32545046-40703934, chr19: 27853206-36012094, chr19: 27362298-35521192 |
| nsv1066031 | chr19: 32545046-40703934, chr19: 27853206-36012094, chr19: 27362298-35521192 |
| nsv543974 | chr19: 32545046-40703934, chr19: 27853206-36012094, chr19: 27362298-35521192 |
| esv3764523 | chr19: 15473200-58657904, chr19: 15362389-58146537 |
| esv3780191 | chr19: 9027982-47441041, chr19: 8917306-46937784 |
| esv3791717 | chr19: 19544555-57886344, chr19: 19433746-57374976 |
| esv3774019 | chr19: 20738647-57182950, chr19: 20555841-56671582 |
| esv3791844 | chr19: 14599935-47707505, chr19: 14489123-47204248 |
| esv3774850 | chr19: 3716291-35955791, chr19: 3716293-35464889 |
| esv3782428 | chr19: 16818104-45071382, chr19: 16707293-44568136 |
| esv3791570 | chr19: 18395374-46202923, chr19: 18284564-45699665 |
| esv3757735 | chr19: 15794071-41489750, chr19: 15683261-40983845 |
| esv3781491 | chr19: 27777214-51960165, chr19: 27286306-51456911 |
| esv3761389 | chr19: 30441778-51970032, chr19: 29950871-51466778 |
| esv3810686 | chr19: 30590199-50809069, chr19: 30099292-50305812 |
| esv3769005 | chr19: 18546210-38390154, chr19: 18435400-37899514 |
| esv3767626 | chr19: 34910232-54079021, chr19: 34419327-53575767 |
| esv3757738 | chr19: 21879872-37689101, chr19: 21697070-37198199 |
| esv3795460 | chr19: 31322366-43567431, chr19: 30831459-43063279 |
| esv3782143 | chr19: 27930422-38345229, chr19: 27439514-37854589 |
| esv3761021 | chr19: 32623539-42946240, chr19: 32132633-42442088 |
| esv3756183 | chr19: 34642736-43855410, chr19: 34151831-43351258 |
| esv3761640 | chr19: 32116544-40819944, chr19: 31625638-40314037 |
| esv3801448 | chr19: 32866852-40473991, chr19: 32375946-39968084 |
| esv3811757 | chr19: 34448819-40670895, chr19: 33957914-40164988 |
| esv3784152 | chr19: 32585813-38531212, chr19: 32094907-38040572 |
| esv3800388 | chr19: 31862181-37006108, chr19: 31371275-36515206 |
| esv3803098 | chr19: 33816618-37399907, chr19: 33325712-36909005 |
| esv3807687 | chr19: 34251126-36892863, chr19: 33760221-36401961 |
| nsv3167559 | chr19: 35523429-35655153, chr19: 35032525-35164250 |
| nsv1188595 | chr19: 24352960-50269722, chr19: 24561120-45577882, chr19: 24378318-45074624 |
| nsv1192123 | chr19: 32611424-45741580, chr19: 27919584-41049740, chr19: 27428676-40543834 |
| nsv1194321 | chr19: 38428761-47887889, chr19: 33736921-43196049, chr19: 33246015-42691897 |
| nsv1192253 | chr19: 36788444-44908571, chr19: 32096604-40216731, chr19: 31605698-39726091 |
| nsv1062546 | chr19: 32545046-45345530, chr19: 27853206-40653690, chr19: 27362298-40147783 |
| nsv1063571 | chr19: 38428761-47887889, chr19: 33736921-43196049, chr19: 33246015-42691897 |
| nsv1056984 | chr19: 36788444-44908571, chr19: 32096604-40216731, chr19: 31605698-39726091 |
| nsv1057673 | chr19: 40035762-40234718, chr19: 35343922-35542878, chr19: 34853018-35051974 |
| nsv949550 | chr19: 39415572-40789137, chr19: 34723732-36097297, chr19: 34232827-35606395 |
| nsv543975 | chr19: 32545046-45345530, chr19: 27853206-40653690, chr19: 27362298-40147783 |
| nsv543992 | chr19: 40035762-40234718, chr19: 35343922-35542878, chr19: 34853018-35051974 |
| [esv3760258](https://www.ncbi.nlm.nih.gov/dbvar/variants/esv3760258" \o "Link to Variant Accession esv3760258) | chr19: 14601946-57885598, chr19: 14491134-57374230 |
| esv3805673 | chr19: 20474342-58434515, chr19: 20363533-57923147 |
| esv3766231 | chr19: 15625513-48893994, chr19: 15514702-48390737 |
| esv3769048 | chr19: 14980172-43915360, chr19: 14869360-43411208 |
| esv3804367 | chr19: 30072572-58634115, chr19: 29581665-58122748 |
| esv3771800 | chr19: 16875204-45628387, chr19: 16764393-45125129 |
| esv3790291 | chr19: 8669728-36389399, chr19: 8604843-35898497 |
| esv3756959 | chr19: 27766667-51779375, chr19: 27275759-51276121 |
| esv3771808 | chr19: 14903083-39080396, chr19: 14792271-38589756 |
| esv3795967 | chr19: 34804995-54173373, chr19: 34314090-53670119 |
| esv3754862 | chr19: 34656333-52007767, chr19: 34165428-51504513 |
| esv3778861 | chr19: 31324986-46202601, chr19: 30834079-45699343 |
| esv3784971 | chr19: 28771149-41192381, chr19: 28280242-40686476 |
| esv3791996 | chr19: 31557783-43212149, chr19: 31066877-42707997 |
| esv3807060 | chr19: 30028520-40753858, chr19: 29537613-40247951 |
| esv3785184 | chr19: 28402180-38728519, chr19: 27911272-38237879 |
| esv3768411 | chr19: 29496725-39753533, chr19: 29005818-39262893 |
| esv3810438 | chr19: 30573927-40712286, chr19: 30083020-40206379 |
| esv3795248 | chr19: 34938681-44405337, chr19: 34447776-43901185 |
| esv3783833 | chr19: 28697760-37355632, chr19: 28206853-36864730 |
| esv3802653 | chr19: 32632968-41254429, chr19: 32142062-40748524 |
| esv3773308 | chr19: 32010510-39918561, chr19: 31519604-39427921 |
| esv3798615 | chr19: 35272200-43148064, chr19: 34781296-42643912 |
| esv3801566 | chr19: 32901612-40693194, chr19: 32410706-40187287 |
| esv3755508 | chr19: 32471161-40074468, chr19: 31980255-39583828 |
| esv3815711 | chr19: 32510713-40045667, chr19: 32019807-39555027 |
| esv3764997 | chr19: 31659188-38742769, chr19: 31168282-38252129 |
| esv3779274 | chr19: 33542803-40499194, chr19: 33051897-39993287 |
| esv3791425 | chr19: 29415881-35880477, chr19: 28924974-35389575 |
| esv3772435 | chr19: 32486583-38227463, chr19: 31995677-37736562 |
| esv3787398 | chr19: 32187445-36377808, chr19: 31696539-35886906 |
| esv3805054 | chr19: 34455655-37852549, chr19: 33964750-37361647 |
| esv3757785 | chr19: 32832613-35761490, chr19: 32341707-35270587 |
| esv3755642 | chr19: 35399612-35803459, chr19: 34908708-35312556 |
| nsv984610 | chr19: 34989096-58586385, chr19: 35480000-59097752 |
| nsv911613 | chr19: 40198569-40226776, chr19: 35506729-35534936, chr19: 35015825-35044032 |
| nsv2757532 | chr19: 266034-54723310, chr19: 266034-54071460 |
| nsv1055359 | chr19: 38113241-40418227, chr19: 33421401-35726387, chr19: 32930495-35235484 |
|  |  |
|  |  |
|  |  |
|  |  |

**Supplemental Figure**

**mRNA expression (human tissues) for SCN1B**


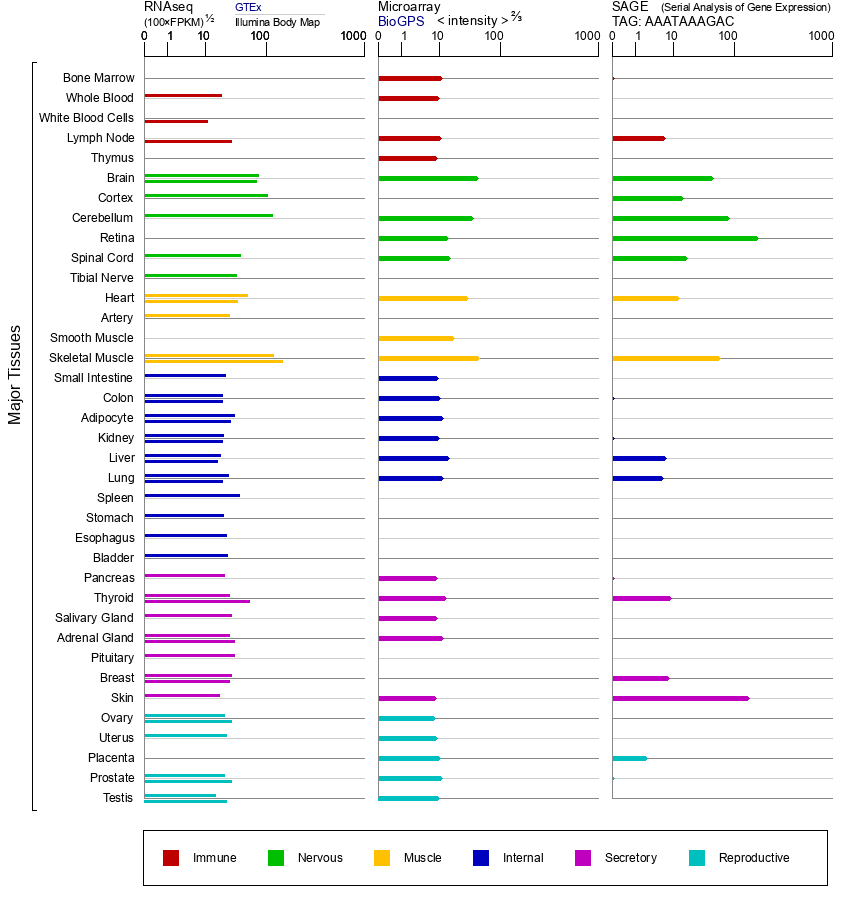

Supplement: Supplementary file 1 [file 28188792]
